# Supplementary material for: Carbon nanodots functional MOFs composites by a stepwise synthetic approach: enhanced H2 storage and fluorescent sensing
Source: Royal Society of Chemistry journal article supplement (doi:10.1039/c4ce02020k), 2014-11-24
Supplement: c4ce02020k1.pdf [file c4ce02020k1.pdf]

Electronic Supplementary Information (ESI) for CrystEngComm  
This journal is (c) The Royal Society of Chemistry 2014

## Supporting Information

### **Carbon nanodots functional MOFs composites by a stepwise synthetic approach: enhanced H<sub>2</sub> storage and fluorescent sensing**

**Ji-Sen Li,<sup>a,b</sup> Yu-Jia Tang,<sup>a</sup> Shun-Li Li,<sup>a</sup> Shu-Ran Zhang,<sup>c</sup> Zhi-Hui Dai,<sup>\*a</sup> Ling Si,<sup>a</sup> and  
Ya-Qian Lan<sup>\*a</sup>**

<sup>a</sup>Jiangsu Key Laboratory of Biofunctional Materials, School of Chemistry and  
Materials Science

Nanjing Normal University, Nanjing 210023, P. R. China

<sup>b</sup>Department of Chemistry and Chemical Engineering,

Jining University, Qufu 273155, P. R. China

<sup>c</sup>Institute of Functional Material Chemistry, Faculty of Chemistry,

Northeast Normal University Changchun 130024, P.R. China

\*Address correspondence to [yqlan@njnu.edu.cn](mailto:yqlan@njnu.edu.cn), [daizhihuii@njnu.edu.cn](mailto:daizhihuii@njnu.edu.cn)

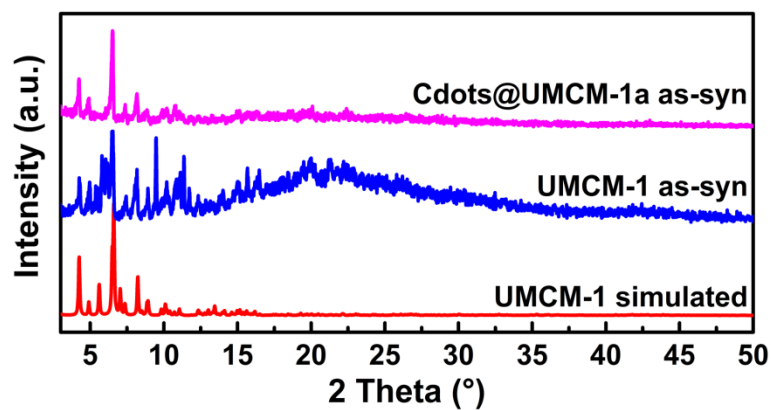

**Fig. S1** PXRD patterns of Cdots@UMCM-1a, as-synthesized UMCM-1, and simulated UMCM-1.

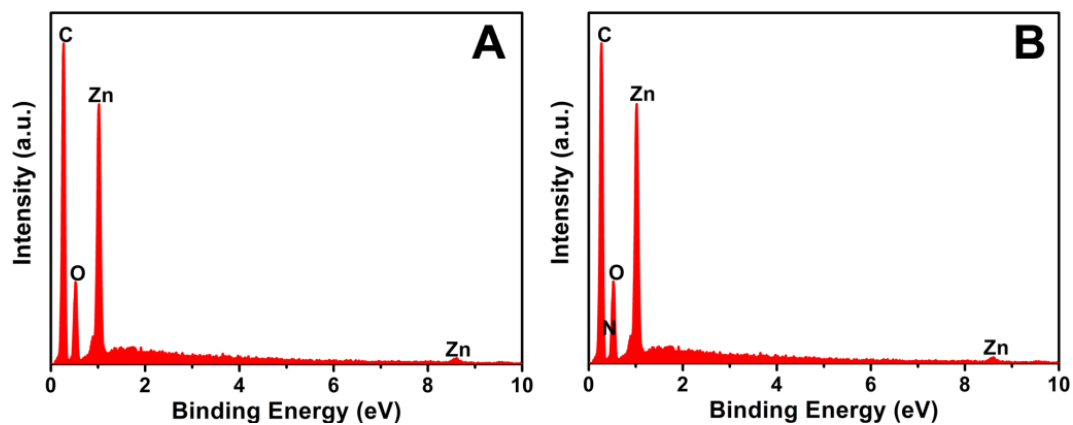

**Fig. S2** EDS of (A) UMCM-1 and (B) Cdots@UMCM-1a.

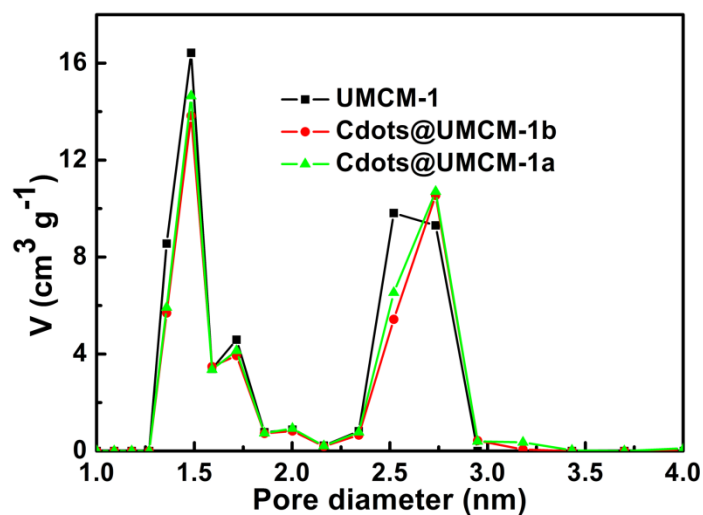

**Fig. S3** Pore size distributions of UMCM-1, Cdots@UMCM-1a, and Cdots@UMCM-1b, respectively.

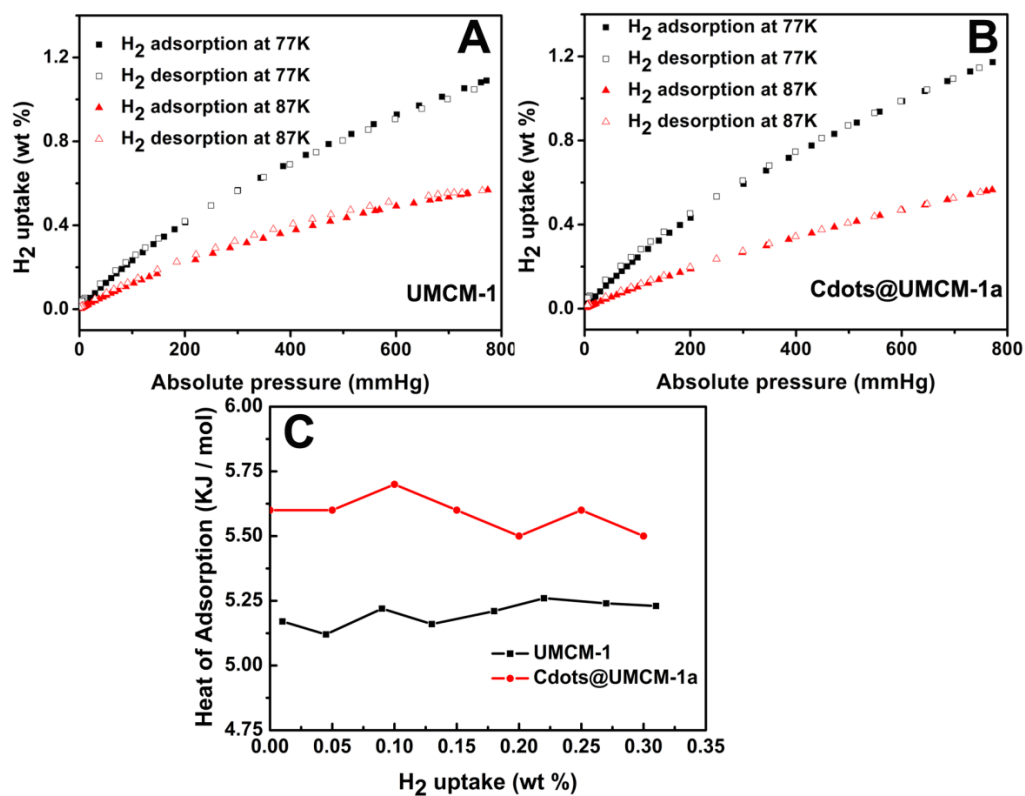

**Fig. S4** (A) and (B) H<sub>2</sub> storage for UMCM-1 and Cdots@UMCM-1a at ambient pressure (using the isotherms at 77 K and 87 K). (C) Isosteric heat of adsorption for H<sub>2</sub> on UMCM-1 and Cdots@UMCM-1a (using the isotherms at 77 K and 87 K).

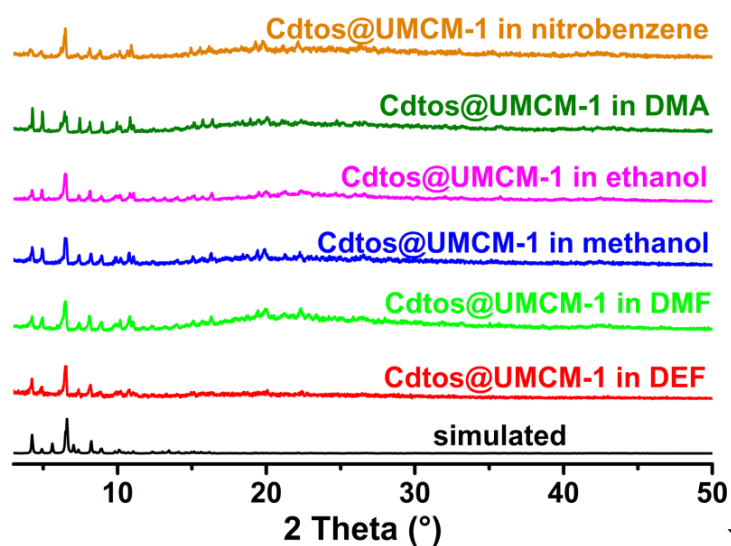

**Fig. S5** PXRD patterns of Cdots@UMCM-1a in different solvents.

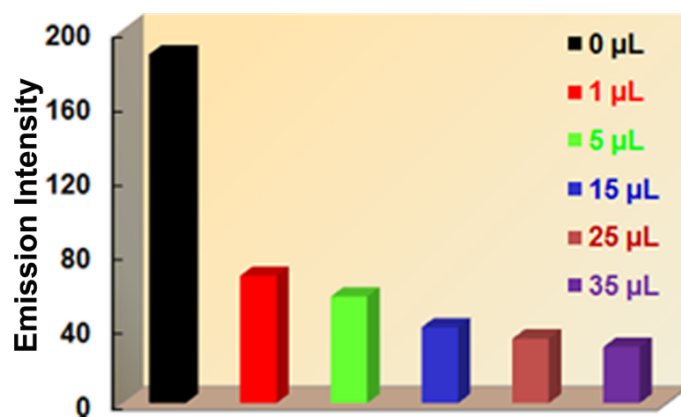

**Fig. S6** The emission intensities of Cdots@UMCM-1a in DEF solution with different amount of NB (excited at 420 nm).

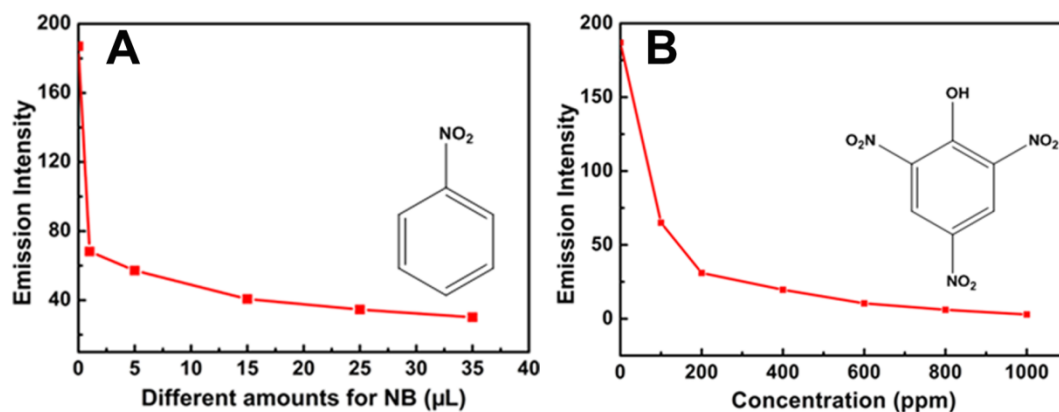

**Fig. S7** The relationship between emission intensity and different amounts for (A) NB, and (B) TNP in DEF solution of Cdots@UMCM-1a, respectively.

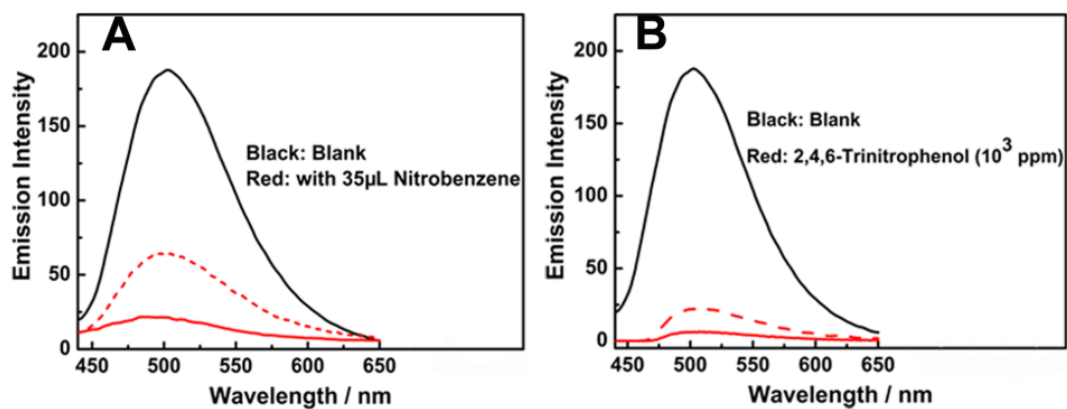

**Fig. S8** FL spectra of Cdots@UMCM-1a (solid line ) and Cdots (dash line) in DEF solution with 0  $\mu\text{L}$  and 35  $\mu\text{L}$  (A) NB or 0 ppm and 1000 ppm (B) TNP, respectively.

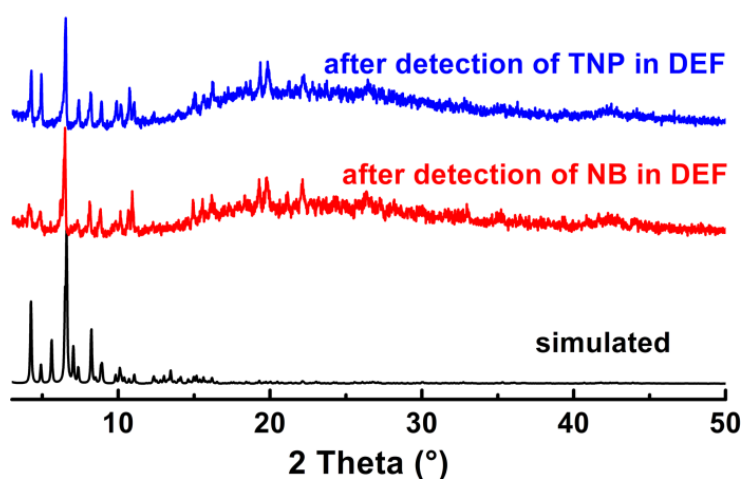

**Fig. S9** PXRD patterns of Cdots@UMCM-1a after detection of NB or TNP in DEF.

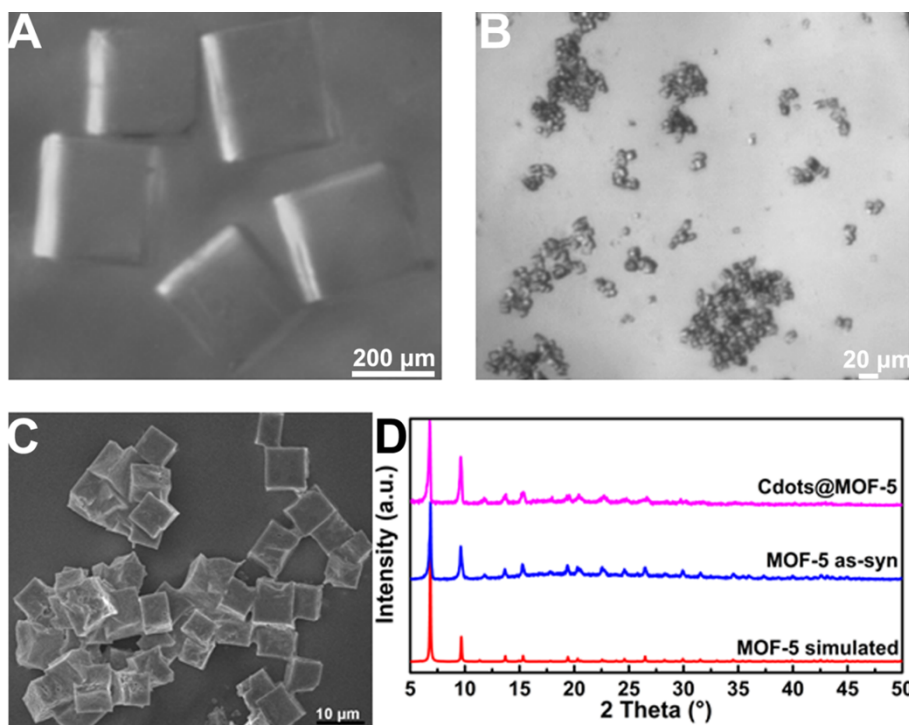

**Fig. S10** Optical micrographs of (A) MOF-5 and (B) Cdote@MOF-5. (C) SEM image of Cdote@MOF-5. (D) PXRD patterns of MOF-5 simulated, MOF-5 as-syn and Cdote@MOF-5 as-syn, respectively.

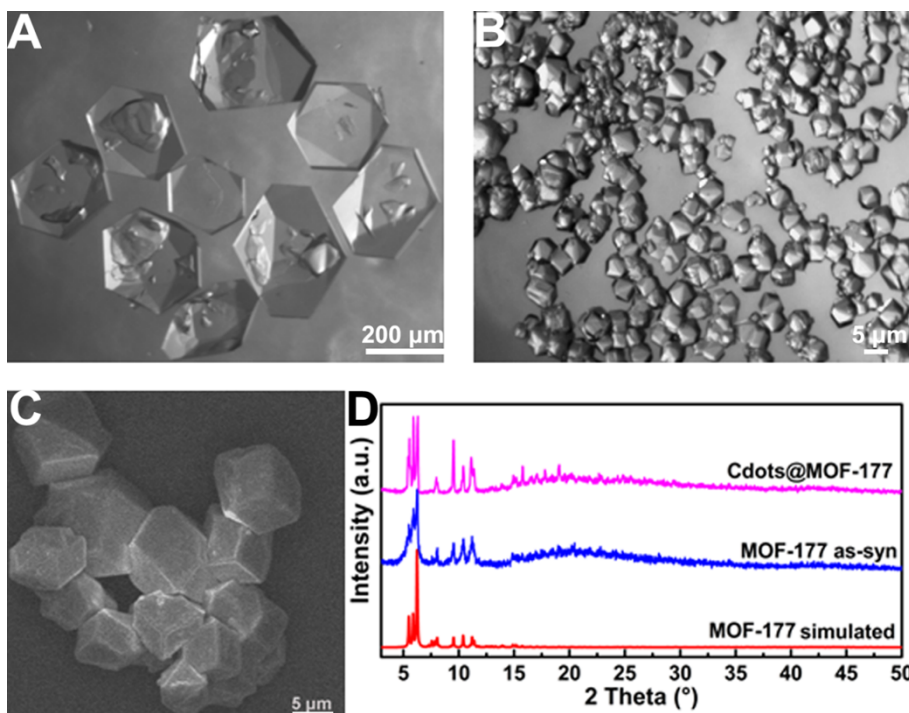

**Fig. S11** Optical micrographs of (A) MOF-177 and (B) Cdote@MOF-177. (C) SEM image of Cdote@MOF-177. (D) PXRD patterns of MOF-177 simulated, MOF-177 as-syn and Cdote@MOF-177 as-syn, respectively.

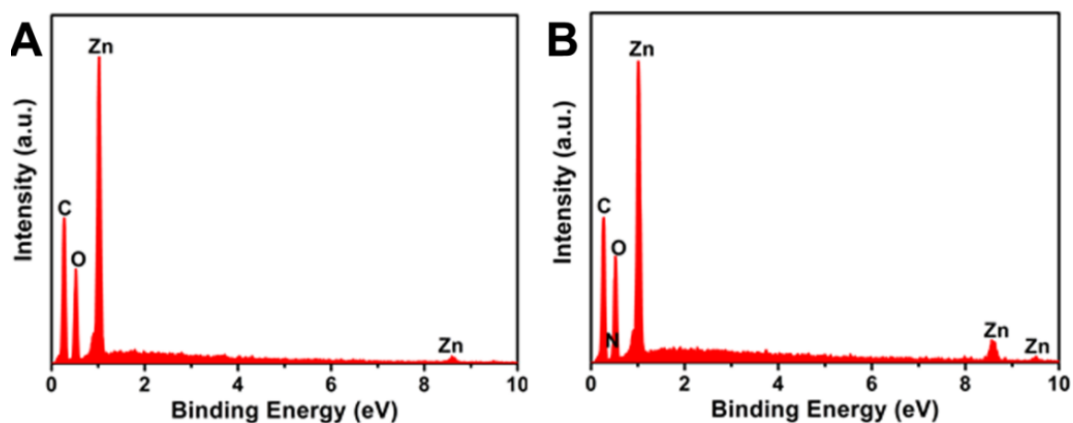

Fig. S12 EDS of (A) MOF-5 and (B) Cdots@MOF-5, respectively.

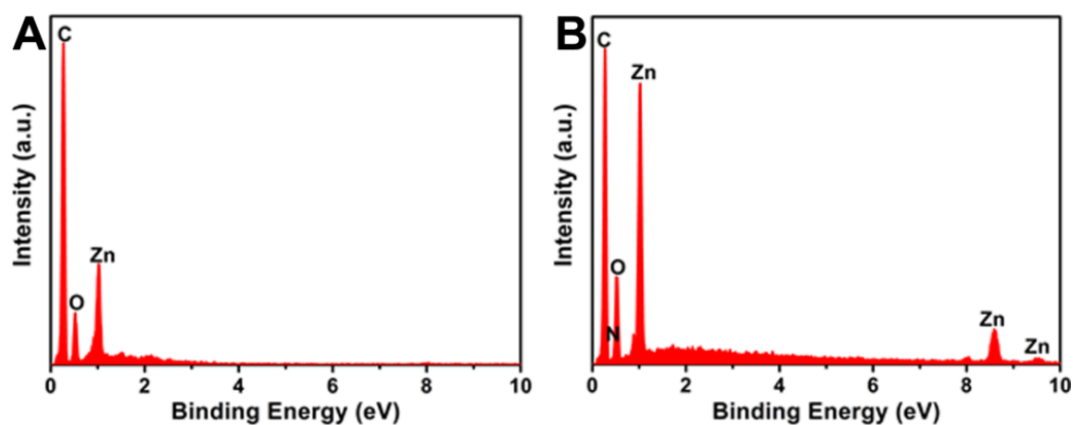

Fig. S13 EDS of (A) MOF-177 and (B) Cdots@MOF-177, respectively.

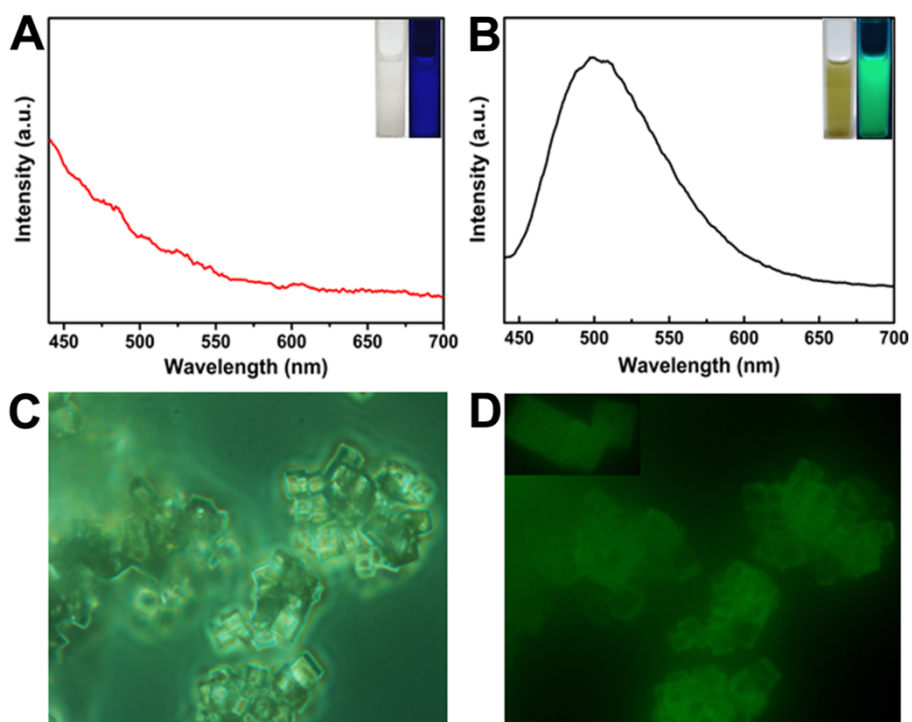

**Fig. S14** PL spectra of (A) MOF-5, and (B) Cdots@MOF-5 with excitation wavelength at 420 nm (insets: photographs of corresponding samples without (left) and with (right) UV light (365 nm)). (C) and (D) CLSM images of Cdots@MOF-5.

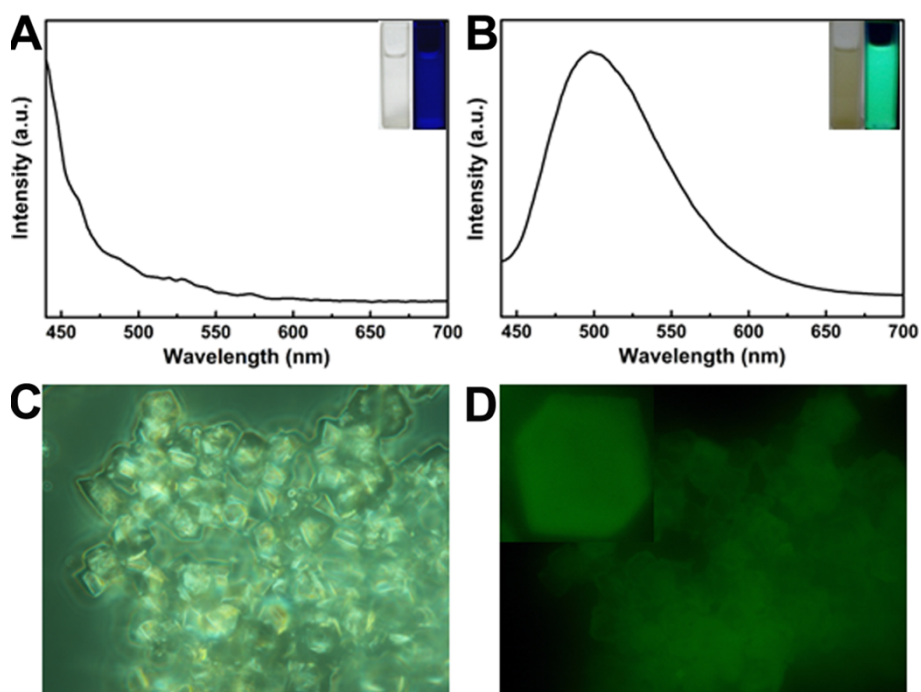

**Fig. S15** PL spectra of (A) MOF-177, and (B) Cdots@MOF-177 with excitation wavelength at 420 nm (insets: photographs of corresponding samples without (left) and with (right) UV light (365 nm)). (C) and (D) CLSM images of Cdots@MOF-177.



**Table S1.** Textural properties and H<sub>2</sub> storage capacities of UMCM-1, Cdots@UMCM-1a, and Cdots@UMCM-1b, respectively.

| Materials                                                           | Surface area                         | Total pore volume                  | Micropore volume                   | Mesopore volume                    | H <sub>2</sub> uptake |
|---------------------------------------------------------------------|--------------------------------------|------------------------------------|------------------------------------|------------------------------------|-----------------------|
|                                                                     | (m <sup>2</sup> g <sup>-1</sup> )    | (cm <sup>3</sup> g <sup>-1</sup> ) | (cm <sup>3</sup> g <sup>-1</sup> ) | (cm <sup>3</sup> g <sup>-1</sup> ) | (wt %)                |
| UMCM-1                                                              | 4150 <sup>a</sup> /6669 <sup>b</sup> | 2.14                               | 0.88                               | 1.26                               | 1.11                  |
| Cdots@UMCM-1b                                                       | 3435 <sup>a</sup> /5512 <sup>b</sup> | 1.79                               | 0.68                               | 1.11                               | 1.22                  |
| Cdots@UMCM-1a                                                       | 3714 <sup>a</sup> /5928 <sup>b</sup> | 1.95                               | 0.71                               | 1.24                               | 1.21                  |
| a The surface area is estimated by applying the BET equations.      |                                      |                                    |                                    |                                    |                       |
| b The surface area is estimated by applying the Langmuir equations. |                                      |                                    |                                    |                                    |                       |
